# Supplementary material for: Gastric Cancer Extracellular Vesicles Tune the Migration and Invasion of Epithelial and Mesenchymal Cells in a Histotype-Dependent Manner
Source: MDPI journal article supplement (doi:10.3390/ijms20112608), 2019-05-28
Supplement: s1 [file s1]

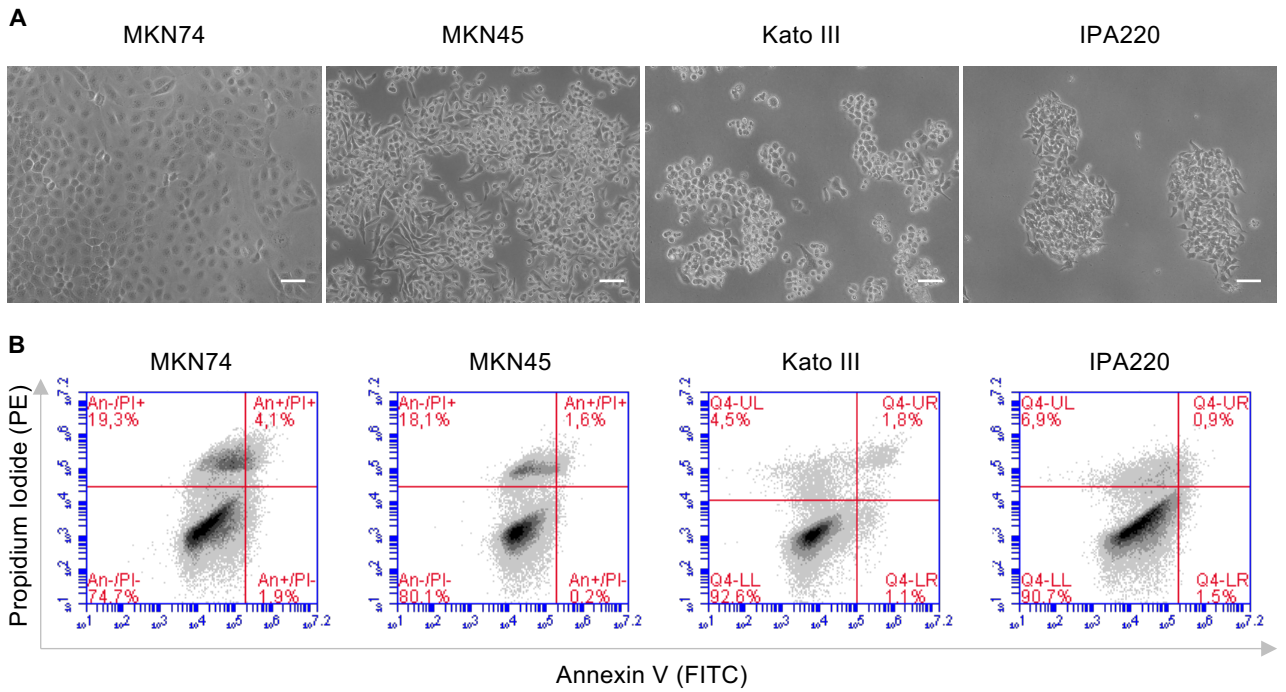

**Figure S1.** Characterization of GC cells before EVs isolation. (A) Representative bright-field microscopic images of MKN74, MKN45, Kato III and IPA220 GC cell lines. MKN74 and MKN45 displayed a more differentiated morphology, resembling the intestinal-type GC. Kato III and IPA220 presented a poorly differentiated phenotype, representative of diffuse-type GC. (B) Viability of GC cells tested by flow cytometry of annexin V (FITC) and propidium iodide (PE).

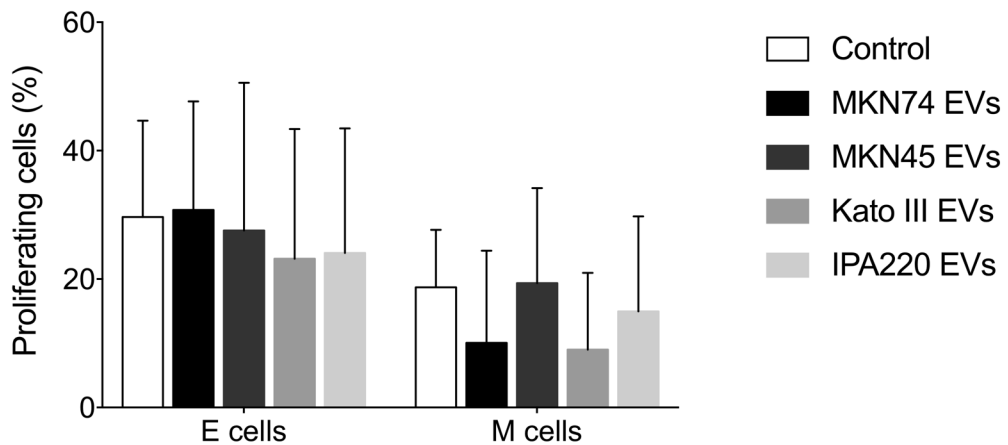

**Figure S2.** GC-EVs do not affect proliferation of epithelial and mesenchymal recipient cells. Graphs represents the mean percentage of proliferating cells  $\pm$  standard deviation of three independent experiments.
